# Supplementary material for: Photodissociation of bromine-substituted nitroimidazole radiosensitizers
Source: Royal Society of Chemistry journal article supplement (doi:10.1039/d2cp04888d), 2023-01-01
Supplement: d2cp04888d1.pdf [file d2cp04888d1.pdf]

## Electronic supplementary information for PCCP

### Photodissociation of bromine-substituted nitroimidazole radiosensitizers

Lassi Pihlava,<sup>a\*</sup> Marta Berholts,<sup>b</sup> Johannes Niskanen,<sup>a</sup> Anton Vladyka,<sup>a</sup> Kuno Kooser,<sup>b</sup> Christian Stråhlman,<sup>c</sup> Per Eng-Johnsson,<sup>d</sup> Antti Kivimäki,<sup>e</sup> and Edwin Kukk<sup>a,f</sup>

<sup>a</sup> Department of Physics and Astronomy, University of Turku, FI-20014 Turku, Finland

<sup>b</sup> Institute of Physics, University of Tartu, EE-50411 Tartu, Estonia

<sup>c</sup> Department of Materials Science and Applied Mathematics, Malmö University, SE-20506 Malmö, Sweden

<sup>d</sup> Department of Physics, Lund University, SE-20100 Lund, Sweden

<sup>e</sup> MAX IV Laboratory, Lund University, SE-20100 Lund, Sweden

<sup>f</sup> Laboratoire de Chimie Physique-Matière et Rayonnement, UMR 7614, CNRS, Sorbonne University, FR-75005 Paris, France

\* Corresponding author, leapih@utu.fi

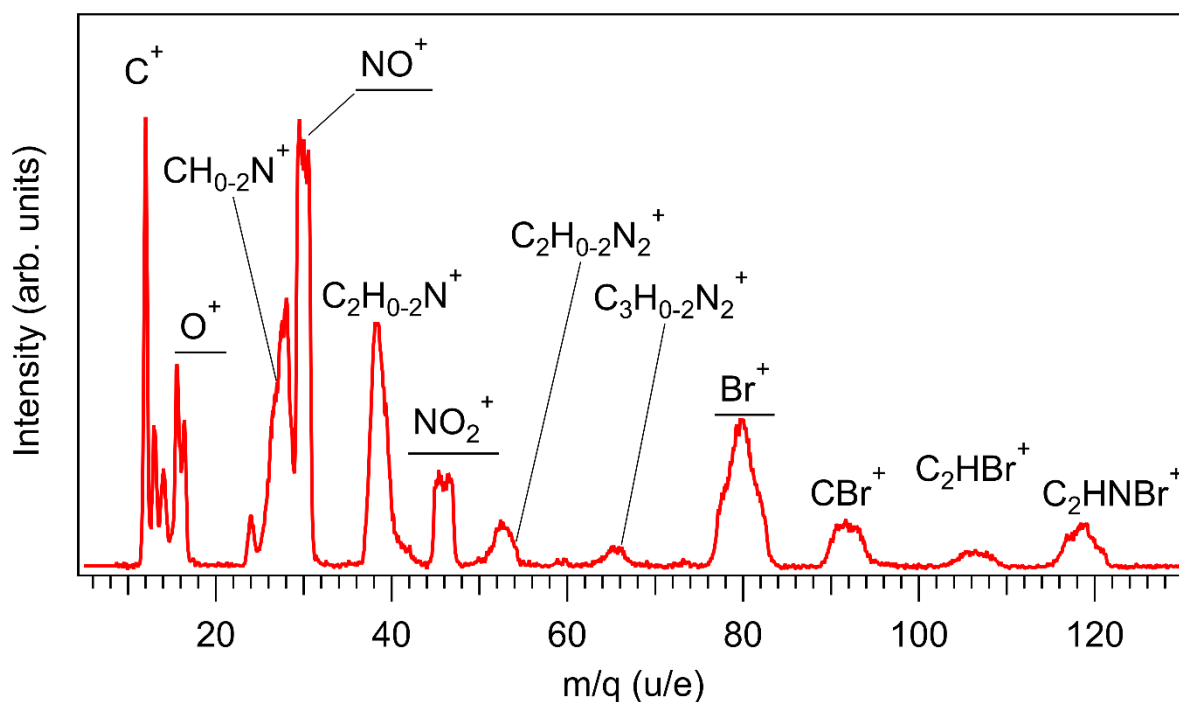

S 1 A TOF spectrum from the C 1s PEPIFICO experiment of 4Br5NIM. A false coincidence background has been removed and the flight times have been converted to mass-to-charge ratio scale.

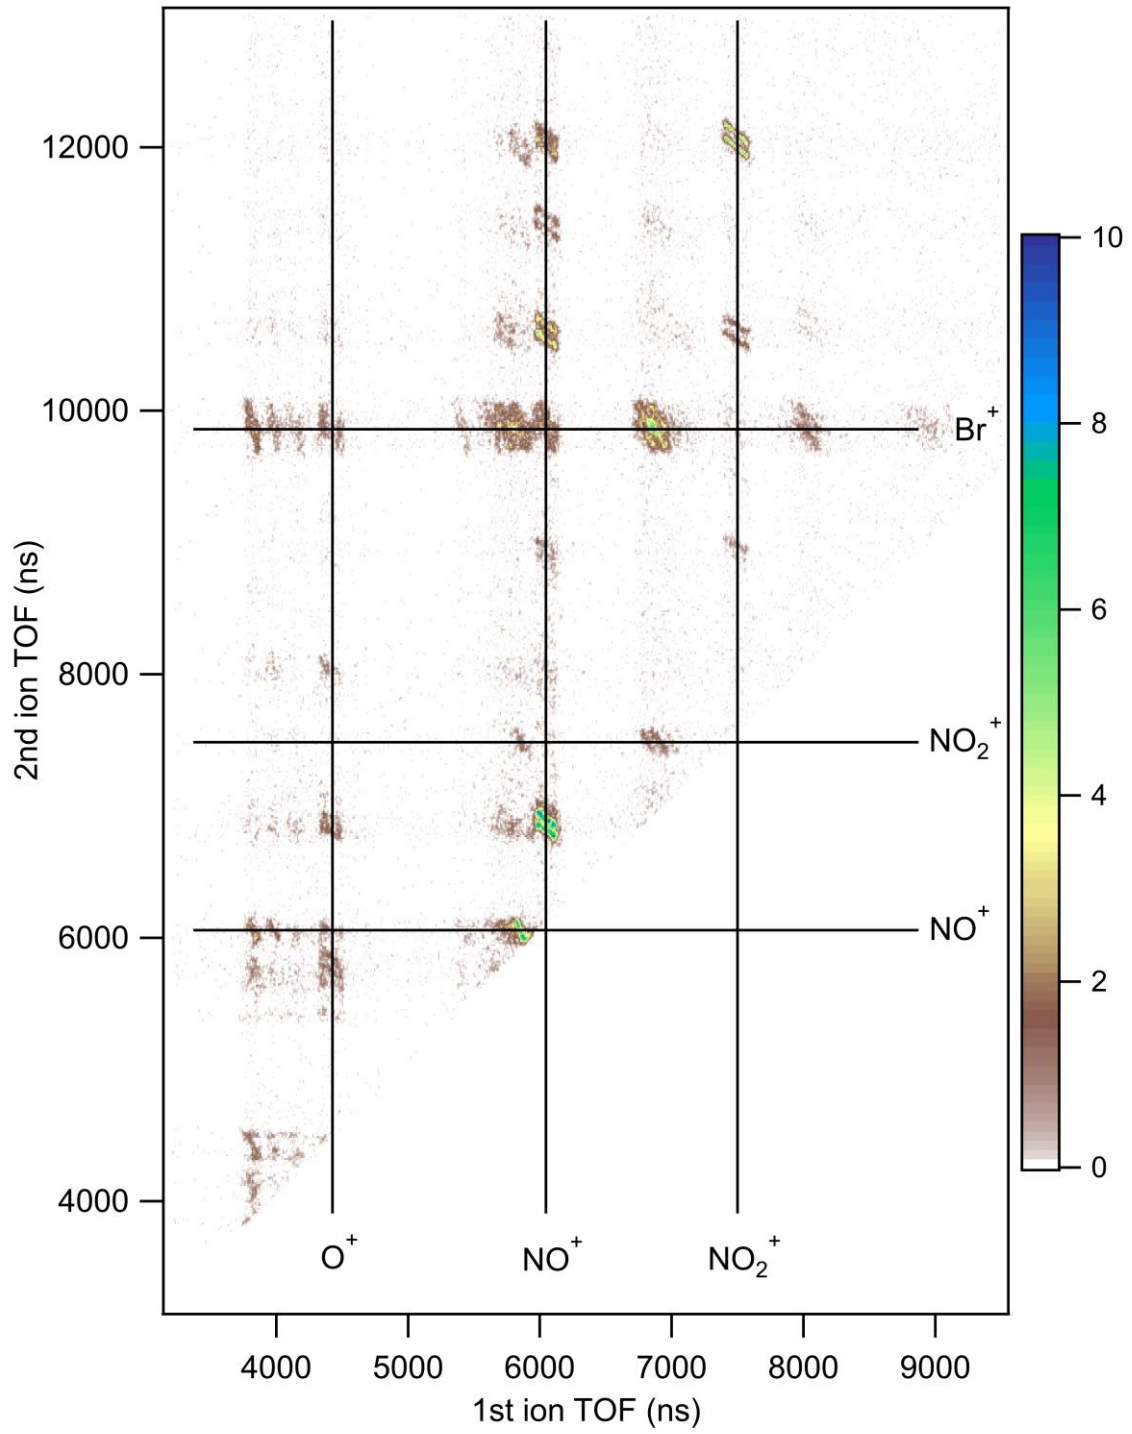

*S 2 A PIPICO map of 4Br5NIM from C 1s PEPIPICO experiment.*

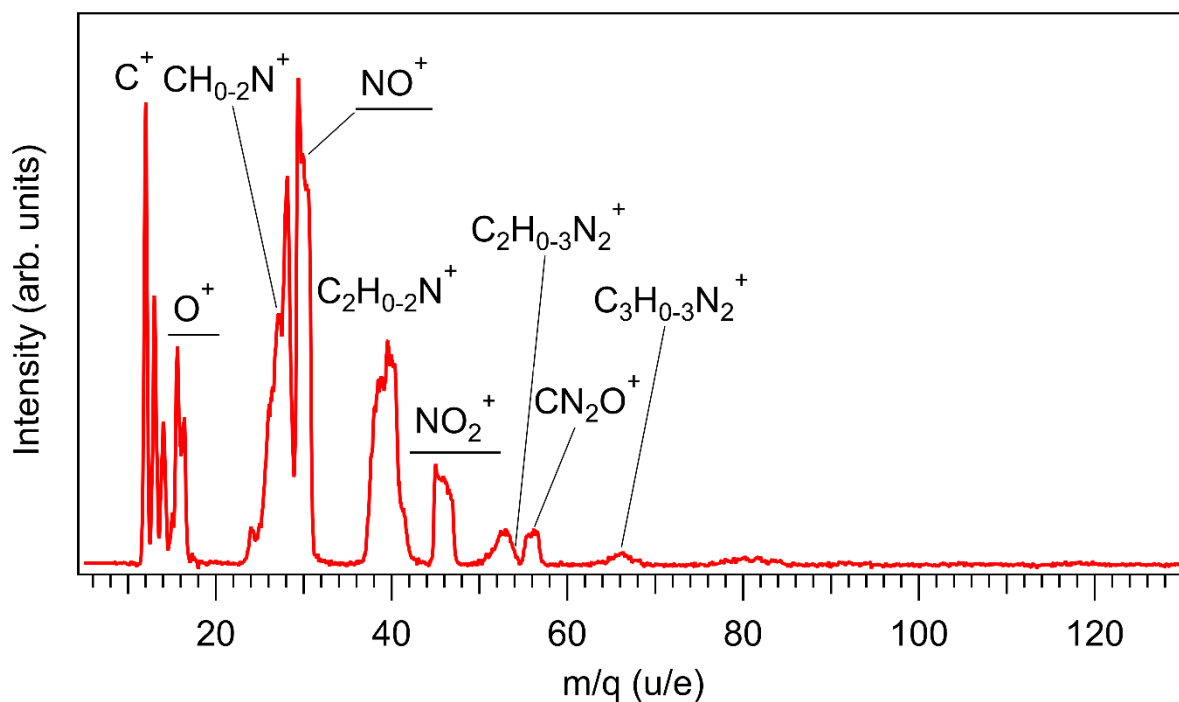

S 3 A TOF spectrum from the C 1s PEPIPICO experiment of 2NIM. A false coincidence background has been removed and the flight times have been converted to mass-to-charge ratio scale.

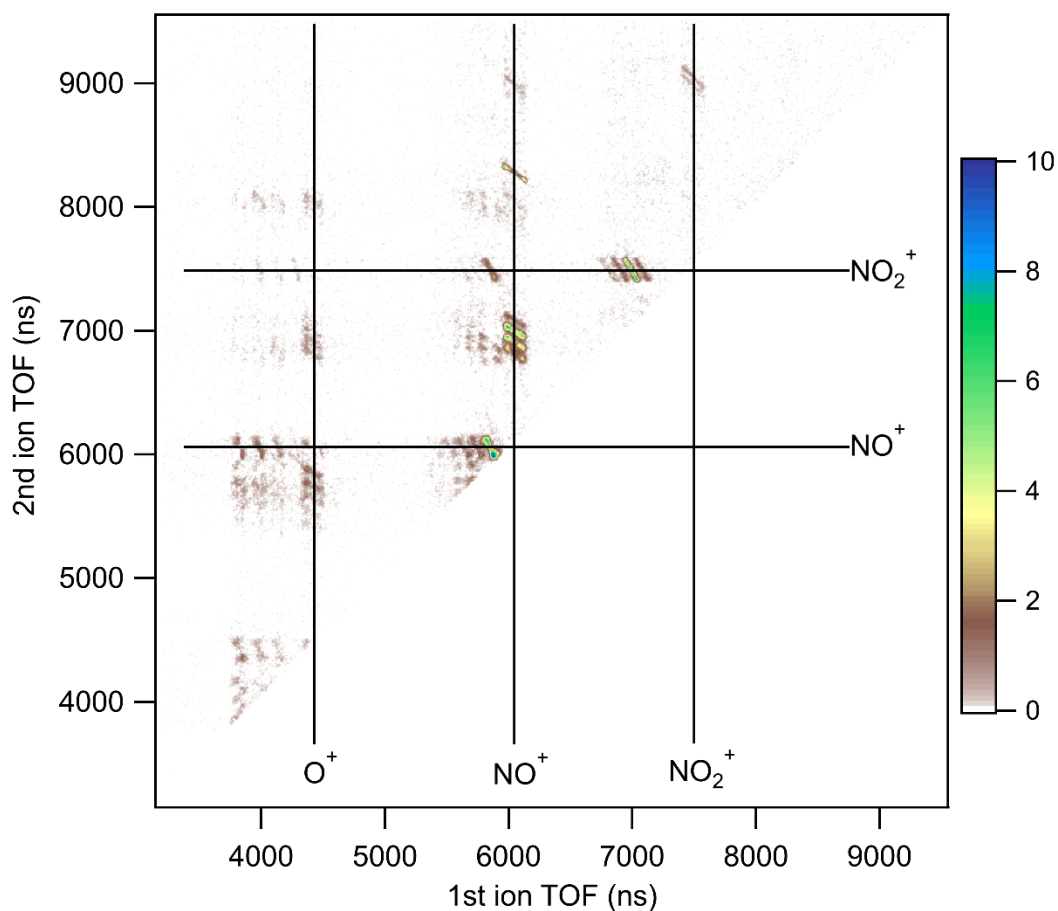

S 4 A PIPICO map of 4Br5NIM from C 1s PEPIPICO experiment.

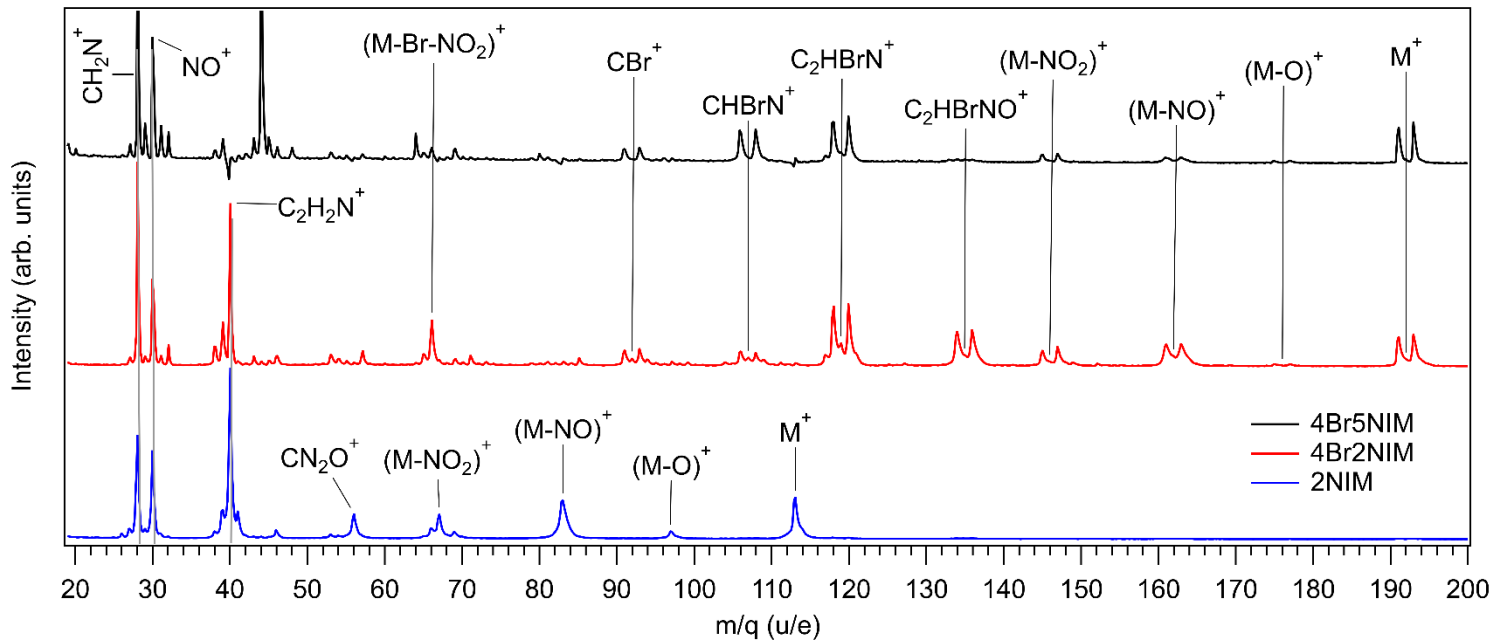

S 5 Mass spectra of the valence ionized samples ( $h\nu = 30$  eV). The parent cations are marked with  $\text{M}^+$  (2NIM:  $\text{C}_3\text{H}_3\text{N}_3\text{O}_2$ ; 4Br2NIM and 4Br5NIM:  $\text{C}_3\text{H}_2\text{BrN}_3\text{O}_2$ ) and the parent peaks are normalized to the same area. Peaks at  $m/q = 28$  u/e likely contain fragments from the samples and rest gas ( $\text{N}_2^+$ ). The TOF spectrum of 4Br5NIM was cross-contaminated by 2NIM, and consequently the spectrum of 2NIM was subtracted from it. The intense peak at 44 u/e in the 4Br5NIM spectrum is suspected to be a contamination.
